# Supplementary material for: Vimentin knockout results in increased expression of sub-endothelial basement membrane components and carotid stiffness in mice
Source: PubMed Central journal article supplement (PMC5599644; doi:10.1038/s41598-017-12024-z), 2017-09-14

## Supplementary materials

### **Vimentin knock-out results in increased expression of sub-endothelial basement membrane components and carotid stiffness in mice**

Benoit LANGLOIS<sup>1</sup>¶, Ekaterina BELOZERTSEVA<sup>1</sup>¶, Ara PARLAKIAN<sup>2</sup>, Mustapha BOURHIM<sup>1</sup>, Jacqueline GAO-LI<sup>2</sup>, Jocelyne BLANC<sup>2</sup>, Lei TIAN<sup>2</sup>, Dario COLETTI<sup>2</sup>, Carlos LABAT<sup>1</sup>, Zhor RAMDAME-CHERIF<sup>1</sup>, Pascal CHALLANDE<sup>3</sup>, Véronique REGNAULT<sup>1</sup>, Patrick LACOLLEY<sup>1</sup>, Zhenlin LI<sup>2\*</sup>

<sup>1</sup> Inserm, UMR\_S 1116, Université de Lorraine, Nancy, France.

<sup>2</sup> Sorbonne Universités, UPMC Univ Paris 06, CNRS, UMR 8256, INSERM ERL U1164, Institut Biologie Paris-Seine, Paris, France

<sup>3</sup> Sorbonne Universités, UPMC Univ Paris 06, CNRS, UMR 7190, Institut Jean Le Rond d'Alembert, Paris, France

¶ Equal contribution.

**Supplementary Table S1. Antibodies used for immunoblotting and immunofluorescence**

| <b>Antibody</b>                                  | <b>Source</b> | <b>Dilution</b> | <b>Society</b> |
|--------------------------------------------------|---------------|-----------------|----------------|
| <b>Western Blot</b>                              |               |                 |                |
| Vim                                              | Guinea pig    | 1/1000          | Progen         |
| Fibronectin                                      | Rabbit        | 1/500           | Sigma-Aldrich  |
| Laminin                                          | Rabbit        | 1/2000          | Sigma-Aldrich  |
| SM-MHC                                           | Rabbit        | 1/1000          | Abcam          |
| Smoothelin                                       | Rabbit        | 1/250           | Santa Cruz     |
| $\alpha_v$ integrin                              | Rabbit        | 1/1000          | Abcam          |
| talin                                            | Mouse         | 1/1000          | Sigma-Aldrich  |
| vinculin                                         | Mouse         | 1/1000          | Sigma-Aldrich  |
| pFAK (Tyr <sup>397</sup> )                       | Rabbit        | 1/1000          | Cell Signaling |
| FAK                                              | Rabbit        | 1/1000          | Cell Signaling |
| pSrc(Tyr <sup>529</sup> )                        | Rabbit        | 1/1000          | Biosource      |
| Src                                              | Rabbit        | 1/1000          | Cell Signaling |
| pERK1/2(Thr <sup>202</sup> /Tyr <sup>204</sup> ) | Rabbit        | 1/1000          | Cell Signaling |
| ERK1/2                                           | Rabbit        | 1/1000          | Cell Signaling |
| Cofilin                                          | Rabbit        | 1/1000          | Cell Signaling |
| RhoA                                             | Rabbit        | 1/1000          | Cell Signaling |
| My19                                             | Rabbit        | 1/1000          | Cell Signaling |
| CPI-17                                           | Rabbit        | 1/1000          | Abcam          |
| Calponin                                         | Rabbit        | 1/1000          | Milipore       |
| MYPT1                                            | Rabbit        | 1/1000          | Cell Signaling |
| Caldesmon                                        | Rabbit        | 1/250           | Santa Cruz     |
| GAPDH                                            | Mouse         | 1/3000          | Sigma-Aldrich  |
| <b>Immunofluorescence</b>                        |               |                 |                |
| Fibronectin                                      | Rabbit        | 1/100           | Abcam          |
| Vinculin                                         | Mouse         | 1/100           | Sigma-Aldrich  |
| SM-MHC                                           | Rabbit        | 1/300           | Cell Signaling |
| Laminin                                          | Rabbit        | 1/200           | Sigma-Aldrich  |
| $\alpha_v$ integrin                              | Rabbit        | 1/300           | Abcam          |
| Perlecan                                         | Rat           | 1/200           | Millipore      |
| Collagen IV                                      | Mouse         | 1/100           | Dako           |
| $\alpha$ -SM actin                               | mouse         | 1/100           | Sigma-Aldrich  |
| Smoothelin                                       | Rabbit        | 1/100           | Santa Cruz     |
| Vimentin                                         | Guinea pig    | 1/100           | Progen         |
| Synemin                                          | Rabbit        | 1/500           | Labo-made      |
| CD31                                             | Rat           | 1/100           | BD Bioscience  |
| VWF                                              | Rabbit        | 1/300           | Dako           |
| VE-cadherin                                      | Rabbit        | 1/100           | BD Bioscience  |

**Supplementary Table S2. Primer sequences**

| Gene family                   | Gene                 | Sense primer (5'-3')   | Anti-sense primer (5'-3') |
|-------------------------------|----------------------|------------------------|---------------------------|
| Extracellular matrix proteins | <i>Coll1a1</i>       | actggtacatcagcccgaac   | tactcgaacgggaatccatc      |
|                               | <i>Col3a1</i>        | accaaaggatgatgctggac   | gacctcgtgctccagtttagc     |
|                               | <i>Col8a1</i>        | gaatgctggaatcaaagga    | ggattcccataggtccgatt      |
|                               | <i>Eln</i>           | gacttctgggaacgtttgga   | agctttataagccgcagcag      |
|                               | <i>Fn1</i>           | aagggtcgggaagaggtgt    | ccgtgtaagggtcaaagcat      |
|                               | <i>Lama2</i>         | ccaagaaggaggctgcatag   | ccagggttgggaagacact       |
|                               | <i>Lama4</i>         | gcctcctgcctgatgtagag   | gacaagatgggttcttgggt      |
|                               | <i>Lamb1</i>         | gttcgagggaaactgctctg   | gttcaggcctttggtgtgt       |
| SMC markers                   | <i>Acta2</i>         | tgtgctggactctggagatg   | gaaggaaatagccacgctcag     |
|                               | <i>Myh11</i>         | ggcttcatttcttctcca     | cgagcgtccatttcttctc       |
|                               | <i>Smtn</i>          | tctcaacagcgagaagctga   | tggtaactctcagacatca       |
|                               | <i>Cald1</i>         | ccaagcctctgacttgagg    | tgggttcttctccgattg        |
|                               | <i>Cf12</i>          | gccaagtgcatttgatctt    | gggaccagtgaaaagggaat      |
| SMC regulatory Proteins       | <i>Cnn1</i>          | ggccaagacaaaaggaaaca   | ccatctgcagtccaatgatg      |
|                               | <i>Ppp1r12a</i>      | ccgcaaaggctatacagaa    | tccactaaaatccgacatgct     |
|                               | <i>Ppp1r14a</i>      | gggacttctggaggcttgt    | ctcaggctggggtcatctg       |
|                               | <i>Myl9</i>          | accgcaacagcgccgaggac   | caaacatggcgaagacattg      |
|                               | <i>Rhoa</i>          | tccgctcggtttctctccatag | cttctcagatgcaaggctca      |
| Focal adhesion proteins       | <i>Itgav</i>         | gggacagggagaaaggagtc   | gattccacagcccaaagtgt      |
|                               | <i>Itgb8</i>         | gaggttttgatgccatgctt   | tgccaatttctgtcaagag       |
|                               | <i>Tln1</i>          | gagaatgagacgggtggtgt   | tccgaagcatctcttctctg      |
|                               | <i>Vcl</i>           | aggccttcttctggtgatt    | aagaaatagggggagcctga      |
|                               | <i>Ptk2</i>          | gcgatcctattgggagatga   | ttttggccttgacagaatcc      |
|                               | <i>Tjp1</i>          | agcaagccttctgcacatct   | cagcatcagtttctgggtttt     |
|                               | <i>Cldn1</i>         | tggaagatgatgaggtgcag   | ccactaatgtcgcagacct       |
|                               | <i>F11r</i>          | tatgatcctgggctctttgg   | gggagaggagaagccagagt      |
|                               | <i>Cdh1</i>          | agccattgccaagtacatcc   | aaagaccggctgggtaact       |
|                               | <i>Cdh5</i>          | ccatcttctctgcatctc     | caactgctcgtgaatctcca      |
|                               | <i>Kdr</i>           | agagttggtggagcatttgg   | taggcagggagagtccagaa      |
|                               | <i>Ednrb</i>         | caggaagaagagcggatgct   | gaggaccaggcagaagactg      |
|                               | <i>Tek</i>           | gatcttacacggtgccgatt   | ttagattggaaggccacag       |
|                               | <i>Angpt1</i>        | gatcttacacggtgccgatt   | ttagattggaaggccacag       |
|                               | <i>Angpt2</i>        | tccaagagctcgggtgctat   | agttggggaaggctcagtg       |
| <i>Nr3c2</i>                  | ctagcacagtggggtccatt | aacgctgtgagcactttct    |                           |
| Reference gene                | <i>Gapdh</i>         | aactttggcattgtggaagg   | acacattgggggttaggaaca     |

Supplementary figure S1.

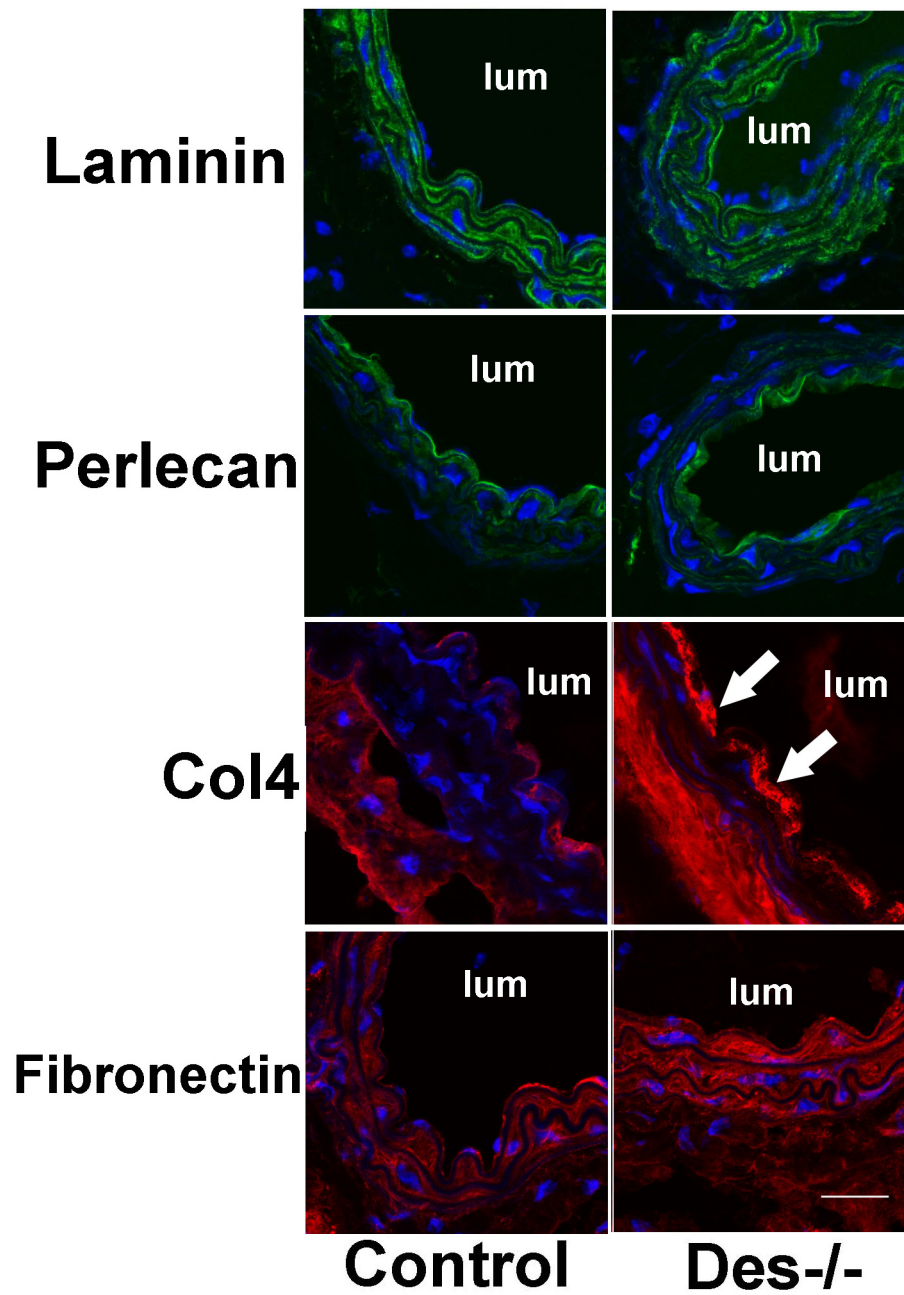

**Supplementary figure S1.** Confocal immunofluorescence images show the increased expression of only collagen IV (red) indicated by arrows, but not laminin (green), perlecan (green) and fibronectin (red) of basement membrane components in Des<sup>-/-</sup> mice compared to control mice. Nuclei are stained in blue. Lum: lumen. Scale bars = 25  $\mu$ m.

Supplementary figure S2.

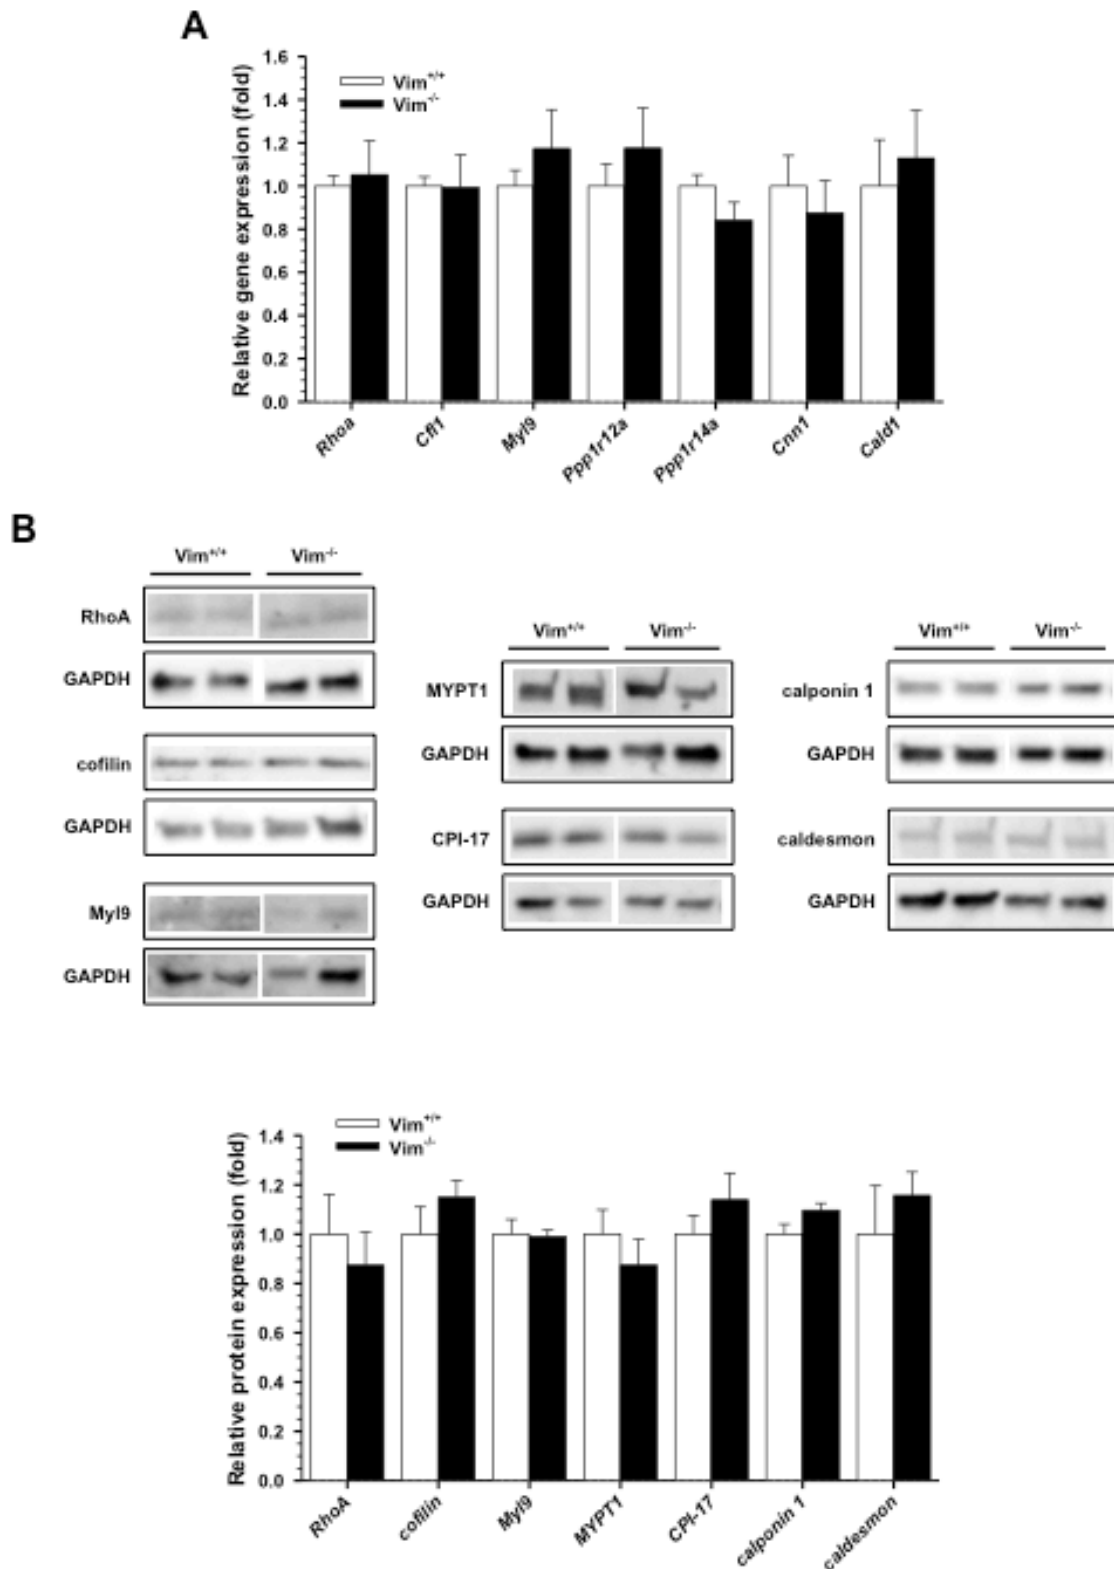

**Supplementary figure S2.** (A) Relative mRNA levels (Vim<sup>-/-</sup> vs Vim<sup>+/+</sup>) of genes encoding RhoA, Cfl1 (Cofilin), Myl9, Ppp1r12a (MYPT1), Ppp1r14a (CPI-17), Cnn1 (calponin) and Cad11 (caldesmon) in the carotid artery by qRT-PCR. (B) Western blot analysis of RhoA, Cofilin, Myl9, MYPT1, CPI-17, calponin and caldesmon in the carotid artery of Vim<sup>-/-</sup> and Vim<sup>+/+</sup> mice. Results are expressed as means  $\pm$  SEM ( $n \geq 6$  in each group). No difference of expression of these genes between the Vim<sup>-/-</sup> and Vim<sup>+/+</sup> mice at both the mRNA and protein levels.

Western blot used in the figures

Figure 1C

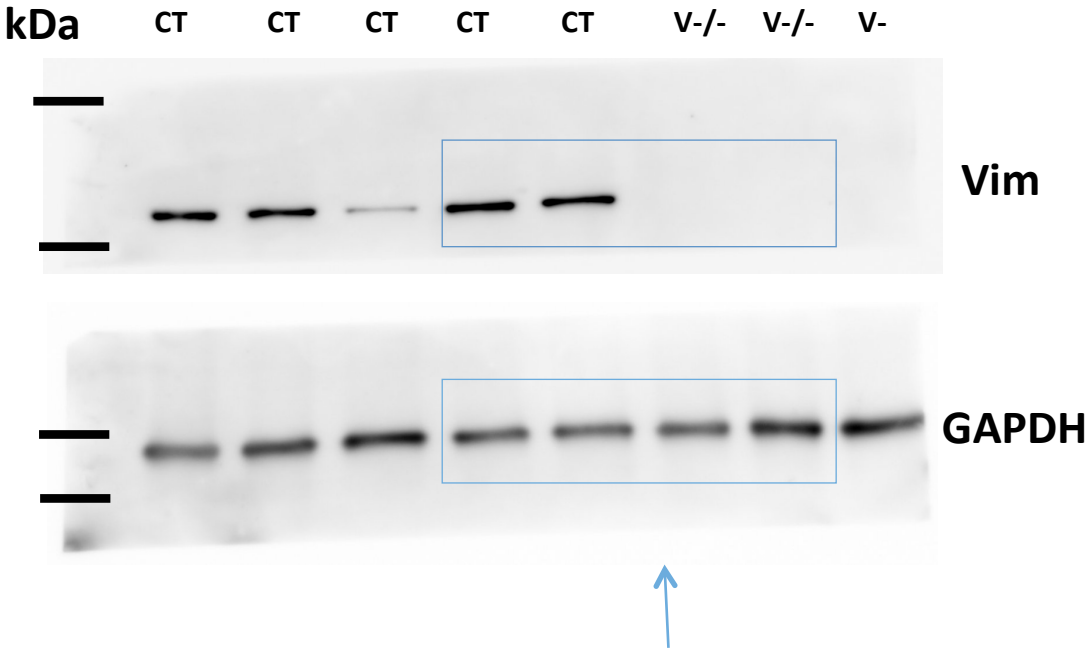



Figure 4C

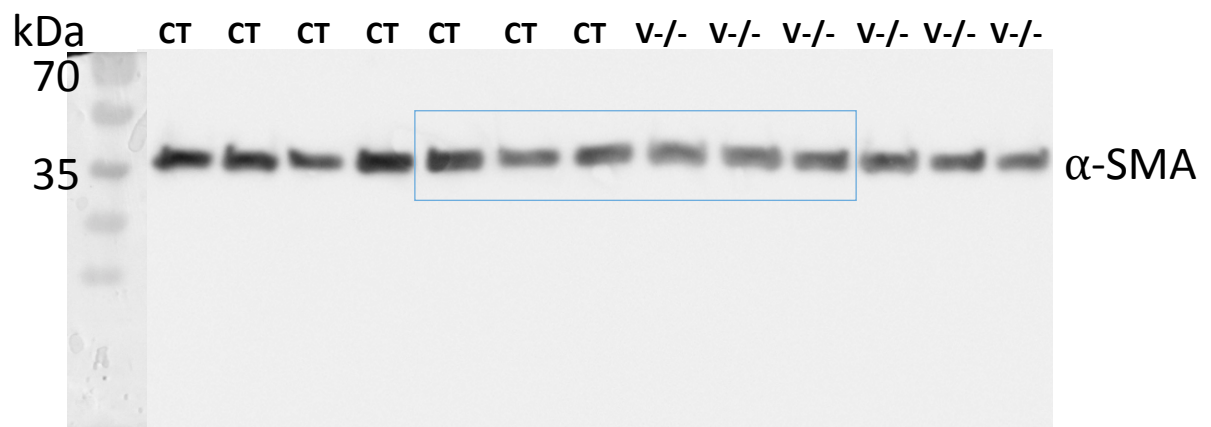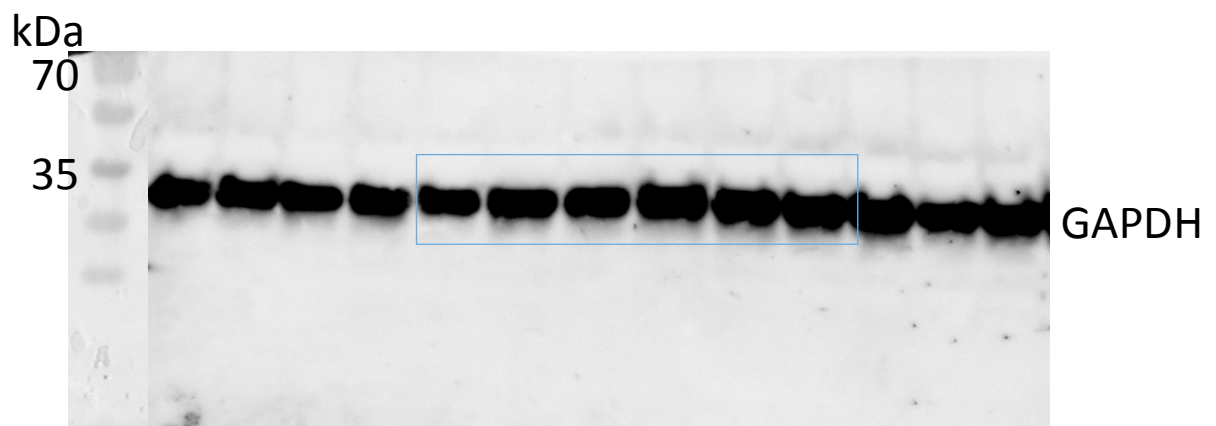







Figure 5B

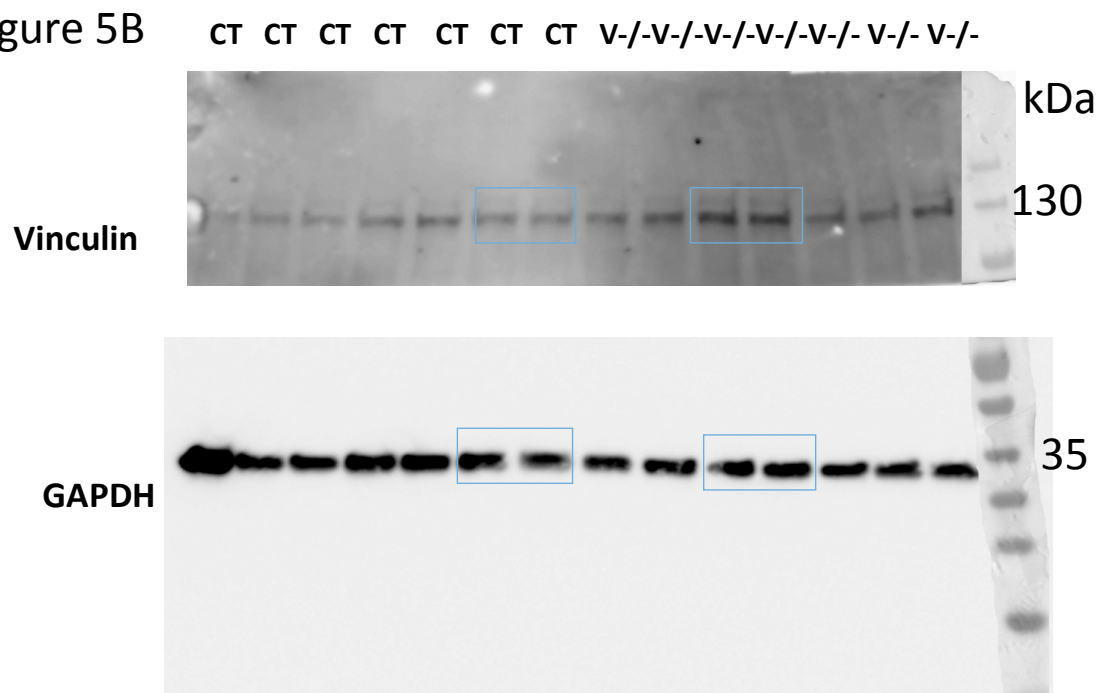

Fig 5D

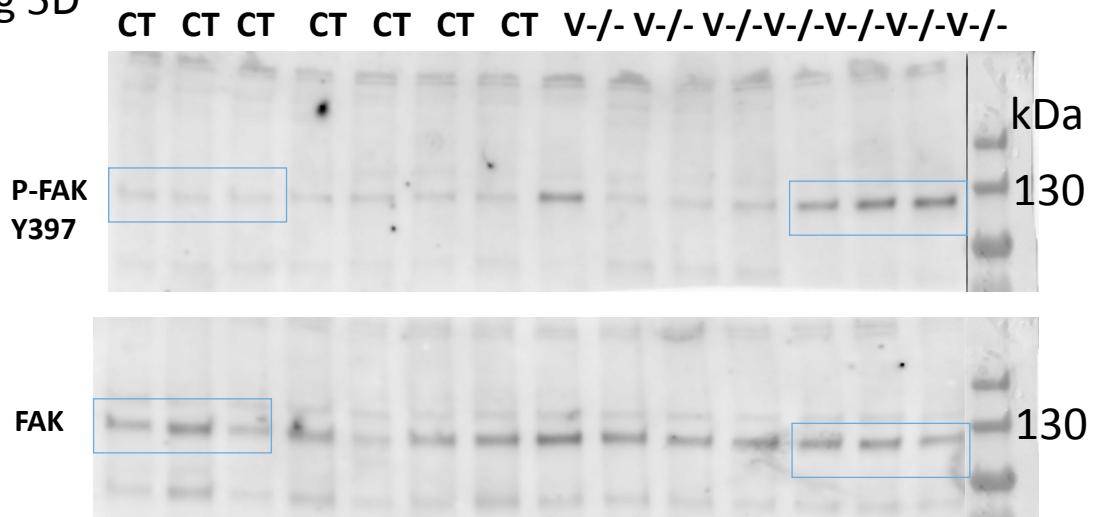

Figure 5D

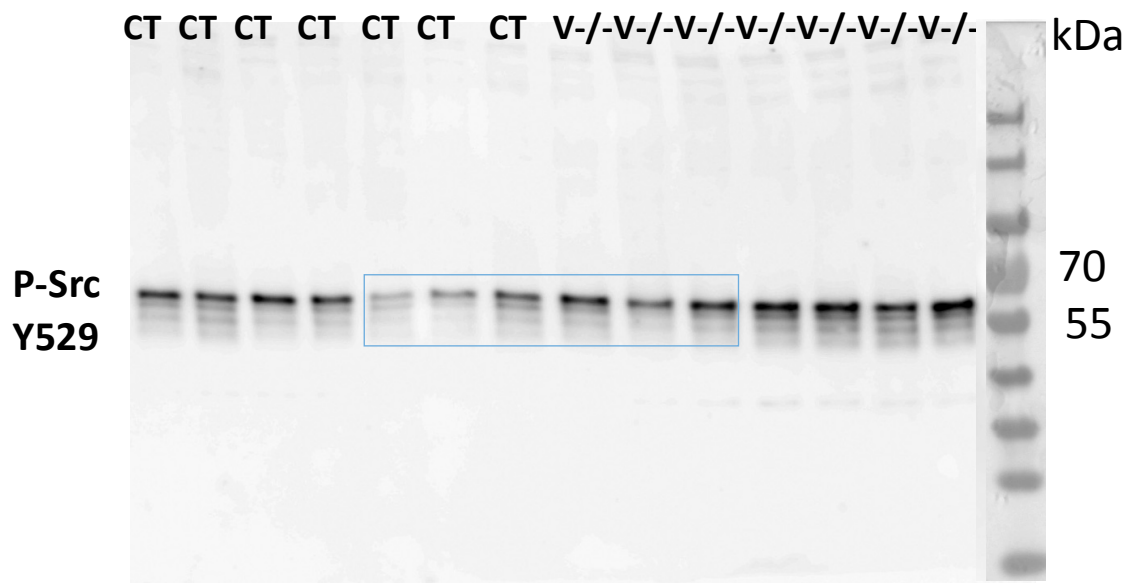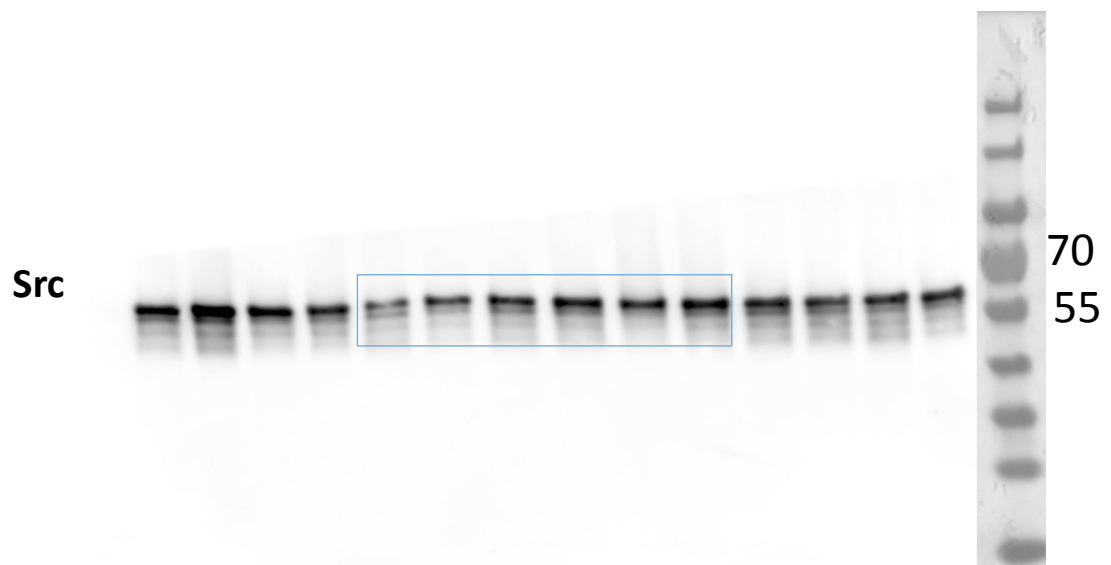

Figure 5D

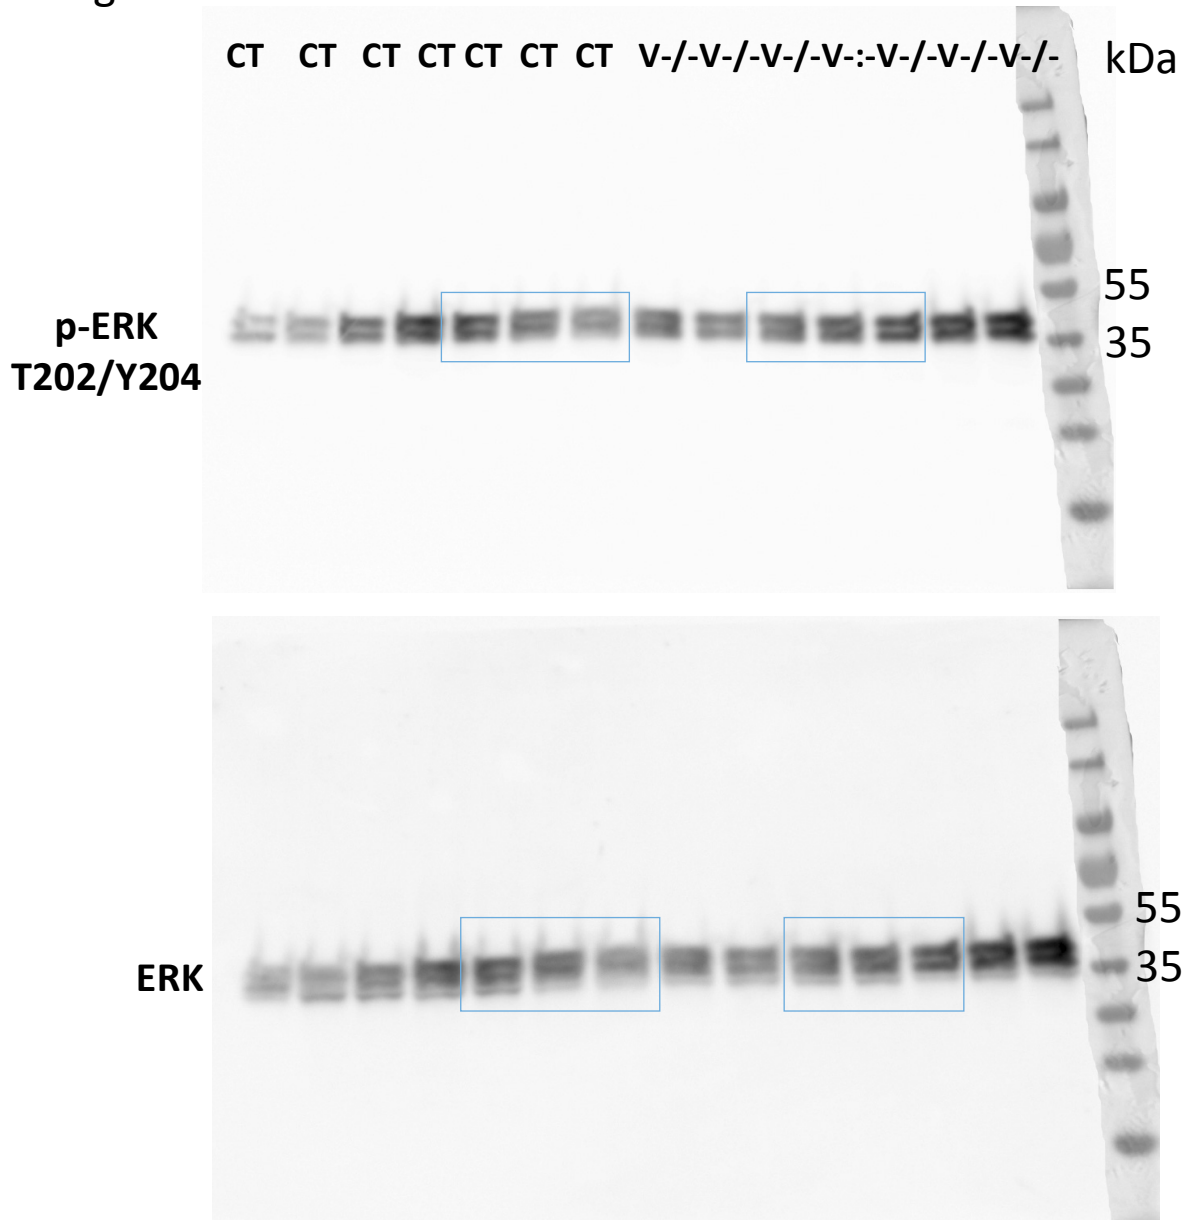

**Supplementary figure S2B.**

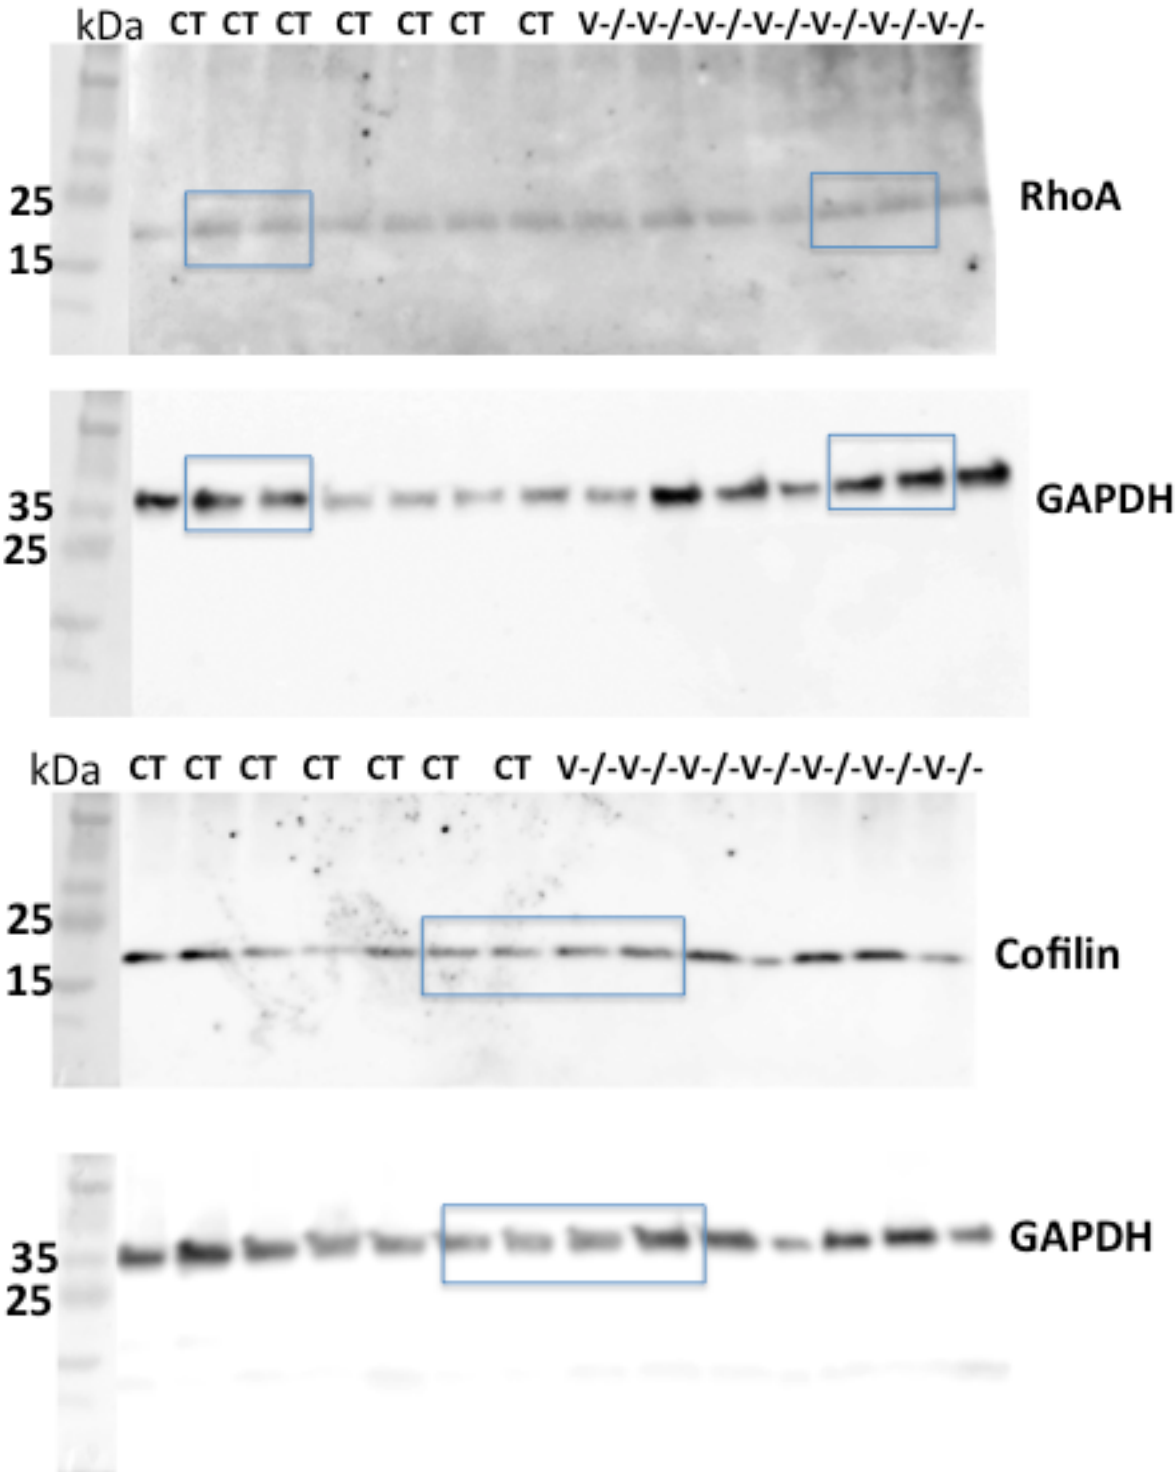

**Supplementary figure S2B.**

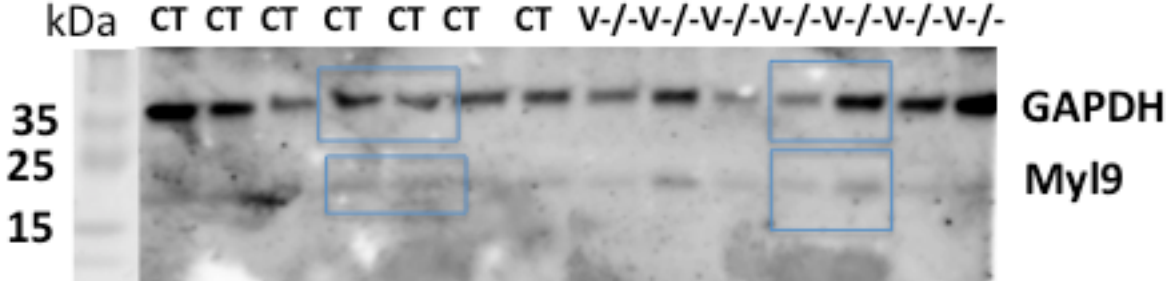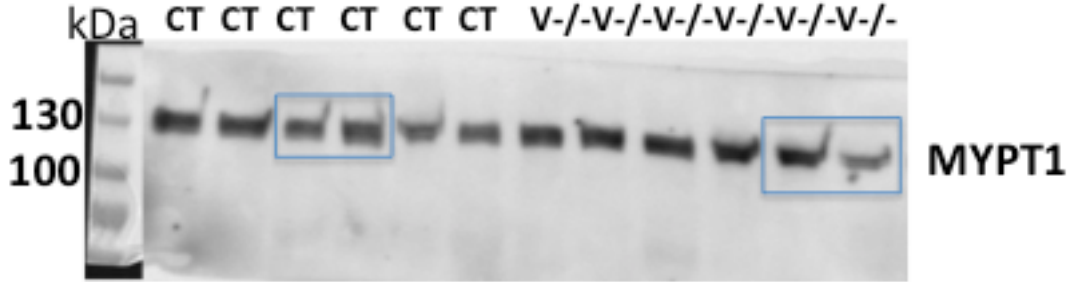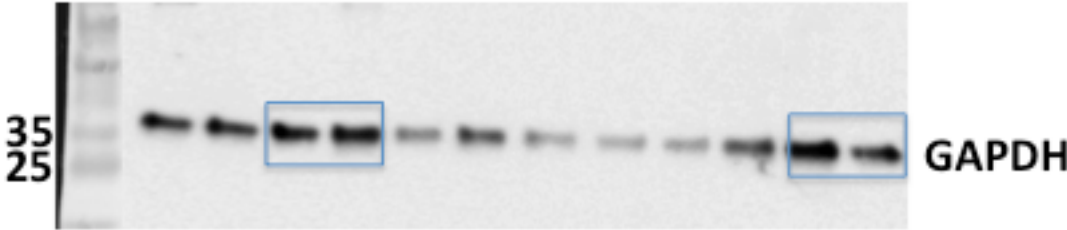



**Supplementary figure S2B.**

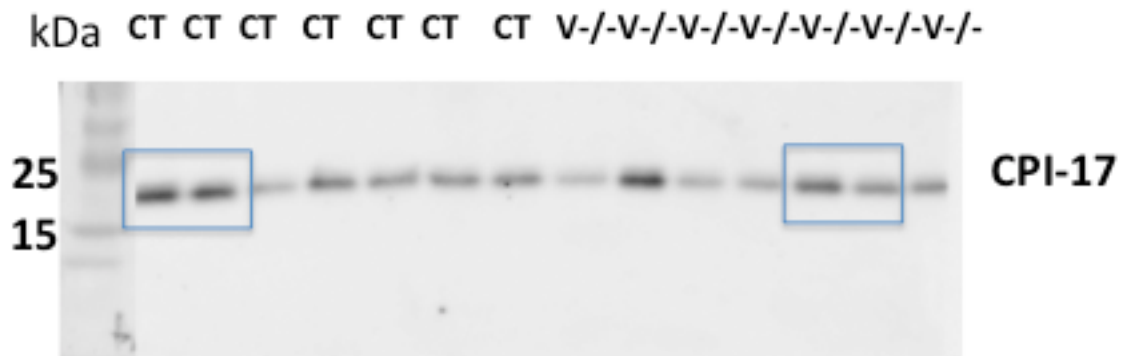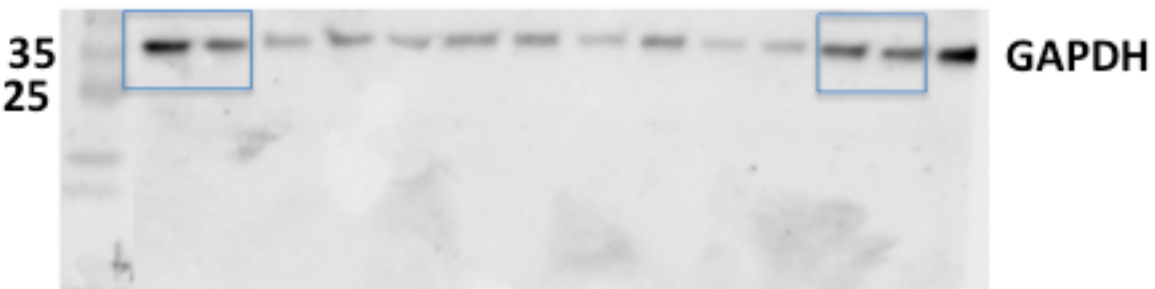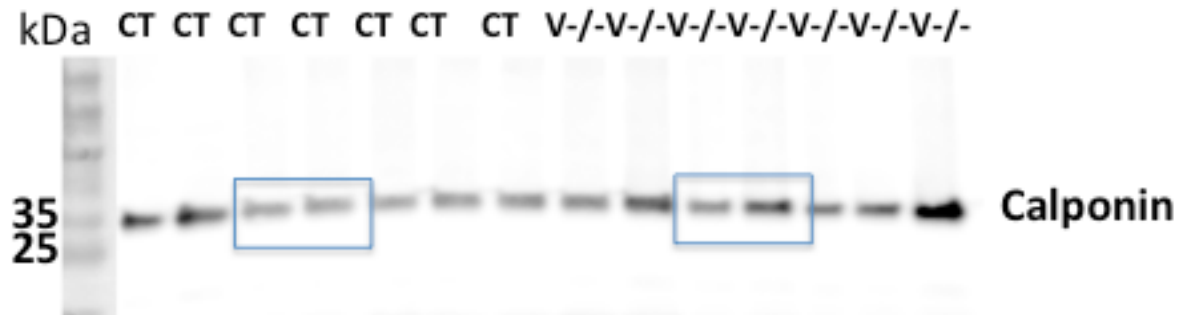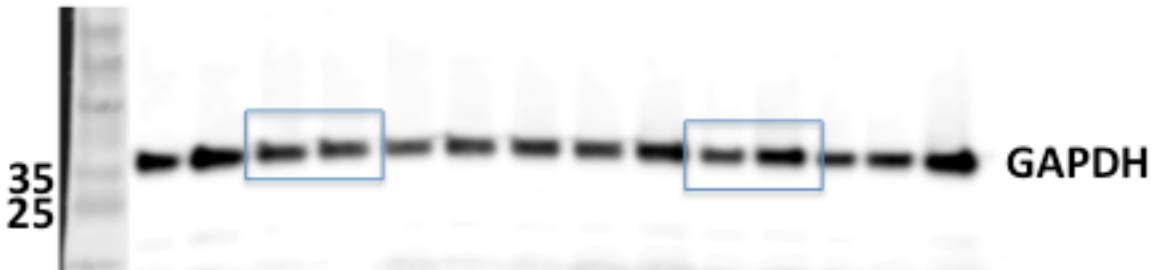

**Supplementary figure S2B.**

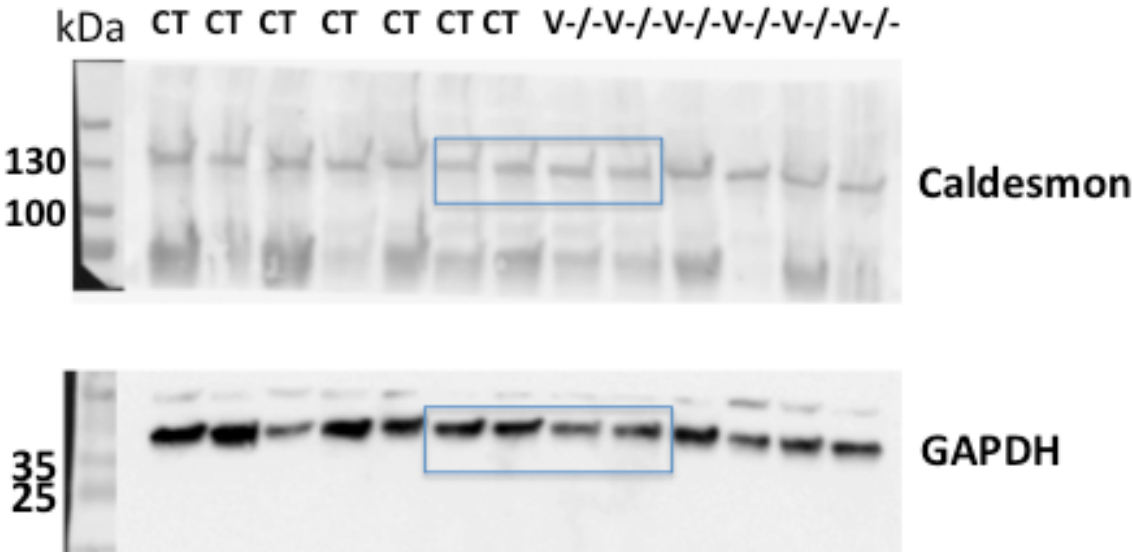

Supplement: 41598_2017_12024_MOESM1_ESM.pdf [file 41598_2017_12024_MOESM1_ESM.pdf]
